## The role of SARS-CoV-2 variants of concern in children and adolescents with COVID-19: a systematic review

Margarethe Wiedenmann<sup>1,2</sup>, Aziz Mert Ipekci<sup>3</sup>, Lucia Araujo Chaveron<sup>4,5</sup>, Nirmala Prajapati<sup>6,7</sup>, Yin Ting Lam<sup>3</sup>, Muhammad Irfanul Alam<sup>4</sup>, Arnaud G. L'Huillier<sup>8</sup>, Ivan Zhelyazkov<sup>9</sup>, Leonie Heron<sup>3</sup>, Nicola Low<sup>3\*</sup>, Myrofora Goutaki<sup>3\*</sup>

<sup>1</sup> Swiss Tropical and Public Health Institute, Basel, Switzerland

<sup>2</sup> University of Basel, Basel, Switzerland

<sup>3</sup> Institute of Social and Preventive Medicine (ISPM), University of Bern, Bern, Switzerland

<sup>4</sup> EHESP French School of Public Health, Paris/Rennes, France

<sup>5</sup> Institute Pasteur, Paris, France

<sup>6</sup> Université Paris-Saclay, Paris, France

<sup>7</sup> Institut national de la santé et de la recherche médicale (INSERM), Paris, France

<sup>8</sup> Geneva University Hospitals and Faculty of Medicine, Geneva, Switzerland

<sup>9</sup> University of Sheffield, Sheffield, United Kingdom

\* These authors have contributed equally to this work and share last authorship

Corresponding author: [margarethe.wiedenmann@swisstph.ch](mailto:margarethe.wiedenmann@swisstph.ch)

**NOTE: This preprint reports new research that has not been certified by peer review and should not be used to guide clinical practice.**

## **Abstract**

**Background:** Infections by SARS-CoV-2 variants of concern (VOCs) might affect children and adolescents differently than earlier viral lineages. We aimed to address five questions about SARS-CoV-2 VOC infections in children and adolescents: i) symptoms and severity, ii) risk factors for severe disease, iii) the risk of becoming infected, iv) the risk of transmission and v) long-term consequences following a VOC infection.

**Methods:** We carried out a systematic review. We searched the COVID-19 Open Access Project database up to 1 March 2022 and PubMed up to 9 May 2022 for observational epidemiological studies about alpha, beta, gamma, delta and omicron VOCs among 0 to 18 year olds. We synthesised data for each question descriptively and assessed the risks of bias at the outcome level.

**Results:** We included 53 articles, of which 47% were from high-income countries and none were from low-income countries, according to World Bank categories. Most children with any VOC infection presented with mild disease, with more severe disease being described with the delta or the gamma VOC. Diabetes and obesity were reported as risk factors for severe disease during the whole pandemic period. The risk of becoming infected with a SARS-CoV-2 VOC seemed to increase with age, while in daycare settings the risk of onward transmission of VOCs was higher for younger than older children or at least partially vaccinated adults. Long-term symptoms or signs following an infection with a VOC were described in <5% of children and adolescents.

**Conclusion:** Overall patterns of SARS-CoV-2 VOC infections in children and adolescents are similar to those of earlier lineages. Comparisons between different pandemic periods, countries and age groups should be improved with complete reporting of relevant contextual factors, including VOCs, vaccination status of study participants and the risk of exposure of the population to SARS-CoV-2.

**PROSPERO registration number:** CRD42022295207

## **Key messages**

### **What is already known on this topic**

SARS-CoV-2 variants of concern (VOCs) might affect children and adolescents differently from earlier viral lineages.

### **What this study adds**

Children and adolescents are susceptible to SARS-CoV-2 VOC infection, though they mostly experience mild disease, and can transmit the VOCs. More severe disease was described with the delta or the gamma VOC but comparison within paediatric age groups as well as to adults is hindered by the lack of reporting of contextual factors such as the vaccination status of these groups.

### **How this study might affect research practice or policy**

The applicability of our findings about clinical presentations, susceptibility and transmissibility of SARS-CoV-2 VOCs is limited by an absence of research from low- and middle-income settings. As new VOCs continue to emerge, new studies are needed globally, with methods and results reported in ways that allow comparison between different VOCs and age groups.

## Introduction

The role of children and adolescents in the pandemic of severe acute respiratory syndrome coronavirus 2 (SARS-CoV-2), the cause of coronavirus disease 2019 (COVID-19), remains an important topic of discussion. SARS-CoV-2 variants of concern (VOCs) have emerged since late 2020, with the alpha variant (previously referred to as B.1.1.7) being the first. These lineages possess one or more mutations, which are associated with different phenotypic properties, such as changes in the severity of disease, increased transmissibility, or the ability to evade infection- or vaccine-induced immunity.<sup>1</sup> The circulation of alpha, beta, gamma, delta, and omicron variants has led to large waves of COVID-19 in different countries.<sup>2</sup> At around the same time as the first VOCs emerged and spread, vaccines that gave protection against infection and severe disease caused by the original SARS-CoV-2 lineage were introduced in adults.<sup>3,4</sup> Vaccines were first licensed for 16-18 year-olds in spring 2021 and later for children <16 years old, but vaccination availability and uptake varied by country.<sup>5</sup> Also, preventive interventions introduced at the population level have been relaxed in many countries. The number of children and adolescents testing positive for SARS-CoV-2 is much higher than in the pre-VOC period, so a re-evaluation of the role of children and adolescents in the SARS-CoV-2 pandemic is warranted.

The objectives of this study were to address five research topics about SARS-CoV-2 VOC infections in children and adolescents: 1. What are the symptoms caused by SARS-CoV-2 VOCs in children and adolescents, and do they differ from those of SARS-CoV-2 wild type infections? 2. What are the risk factors for severe COVID-19 in children and adolescents infected with a SARS-CoV-2 VOC? 3. Does the risk of infection with a SARS-CoV-2 VOC differ between children, adolescents and adults who have not received a COVID-19 vaccine? 4. Does the risk of transmission of a SARS-CoV-2 VOC differ between children, adolescents and adults who have not received a COVID-19 vaccine? 5. Does the risk of developing long-term effects (long-COVID) after infection with a SARS-CoV-2 VOC differ between children, adolescents and adults who have not received a COVID-19 vaccine?

## Methods

### Design

We registered a protocol for this review in the International Prospective Register of Systematic Reviews (PROSPERO) (registration ID: CRD42022295207).<sup>6</sup> We have published an earlier version of this review, covering the period before the circulation of VOCs.<sup>7</sup> We report the study according to the Preferred Reporting Items for Systematic Review and Meta-Analyses guidelines (supplementary table 1).<sup>8</sup>

### Search strategy

We searched: 1) the COVID-19 Open Access Project (COAP) database, which aggregates COVID-19 research from PubMed, EMBASE, PsycINFO, bioRxiv and medRxiv from 1 January 2020 to 1 March 2022 and 2) PubMed using MeSH terms from 1 August 2020 to 30 January 2022.<sup>9</sup> Owing to large numbers of records that did not fulfil the inclusion criteria, we revised the PubMed search strategy, including each VOC, identified by their Greek letter and Pangolin lineage terminology, and conducted two new searches between 31 January and 7 March and between 8 March and 9 May 2022. We also searched reference lists of systematic reviews and included studies, and we included studies suggested by experts in the field, but not identified by our search. Full search terms are included in the supplementary note 1.

### Eligibility and screening

Observational epidemiological studies (case series with more than one case, cross-sectional studies, case-control studies and cohort studies) and modelling studies were eligible for inclusion. We did not apply any geographical or language restrictions to the search, but we only read the full text of papers written in languages spoken fluently by the review team (English, German, French, Greek, Italian, Spanish or Turkish). Identified titles and abstracts were screened by one member from an international team of ten reviewers and a second member verified the selection. We followed the same approach for full-text screening. A third reviewer resolved disagreements.

### Data extraction

We developed, piloted and revised a data extraction template in Microsoft Excel at the beginning of the study. One reviewer extracted data from each included study

and a second reviewer verified the extraction. Extracted data included information on the publication characteristics, study design, study setting, study population overall and those younger than 20 years old, age groups, prevalent VOC(s) at the time of study, and outcomes for each relevant review question.

### Risk of bias assessment

We assessed the risk of bias at the outcome level using published tools for cohort and case control studies.<sup>10,11</sup> The credibility and relevance of modelling studies was evaluated using a published checklist.<sup>12</sup> To help with interpretation of the findings, we also recorded whether the authors of included studies reported on the stage of the SARS-CoV-2 pandemic, on any existing control measures, or on the vaccination status of the study participants at the time of the study.

### Data synthesis

We synthesised the information from the included studies descriptively for each question. We tabulated summaries of the data extracted, including the number of studies identified for each VOC, the age groups studied and the outcomes reported. The presence of a VOC was determined by genetic sequencing or by assumptions based on authors' reporting, the dominant lineage at the time of testing, and the study location. Definitions of disease severity differed between studies. To allow comparisons, we applied the following categorisation: mild or asymptomatic disease (patients were not hospitalised), moderate disease (patients were hospitalised, but did not require intensive care), severe disease (patients were hospitalised and intensive care was necessary). If we did not have sufficient information to apply these categories, we used the authors' definitions and reported these in the text. Where possible, we presented the results separately for different age groups: neonates and infants 0-1 years old; young children 1-4 years old; older children 5-9 years old; younger and older adolescents 10-20 years old. If the intended age groups were not reported, we used the groups reported by study authors. We categorised the country in which the study was conducted according to World Bank income groups as a simplified proxy for the level of government resources spent on health services and public health surveillance activities.<sup>13</sup> We report our findings descriptively. There were too few studies that reported quantitative findings in a comparable way to conduct meta-analysis.

## Patient and public involvement

This research was done without patient or public involvement.

## Results

We screened 2407 articles published up to 09 May 2022, 53 of which were included (figure 1 and supplementary figures 1-4). According to World Bank data, forty-seven (89%) articles were from 14 high-income countries, six (11%) were from five upper middle-income countries and none was from a lower middle-income or low-income country (table 1 and figure 2).

Of the 53 studies included in the review, 44 (83%) were cohort studies, 4 (7.5%) were cross-sectional studies, 3 (5.7%) were case-control studies, 1 (1.9%) was a modelling study and 1 (1.9%) was a case-series (table 1). Some included studies compared different variants and others different age groups, infected with the same variant.

Most studies were judged to be at moderate risk of bias in most domains. There were high risks of bias in a few domains especially regarding matching of exposed and unexposed cohorts as well as the assessment of prognostic factors (irrespective of the research question they addressed) as most studies did not control for possible confounding factors (supplementary tables 2-6).

### Review question 1: Symptoms and severity of disease among children and adolescents infected with VOCs

**Symptoms:** Symptoms experienced by children and adolescents infected with a VOC were presented in 18 studies involving the alpha (n=7), delta (n=6), omicron (n=4) or gamma variant (n=1) (supplementary tables 7-10). Children and adolescents experienced a wide range of symptoms. We did not identify any symptoms consistently associated with a specific VOC or whether symptom frequencies with VOC infections differed from the pre-VOC period. One study reported on croup in children and adolescents infected with the omicron variant and found an increase in croup cases in hospital inpatients and outpatients compared with the pre-omicron period (median weekly croup cases (omicron vs. pre-omicron): 11 [IQR 2–17] vs. 0 [IQR 0-0],  $p < 0.001$ ) (supplementary table 9).<sup>37</sup> We did not find any studies investigating symptoms in children infected with the beta variant. A detailed

comparison between studies was not possible owing to differences in study populations (community or health care setting), symptoms recorded and age groups reported.<sup>14-18,20,22-24,27,31-33,35,36,38-40</sup>

**Severity:** Children and adolescents mostly experienced mild disease when infected with a SARS-CoV-2 VOC. More severe infections were described with the gamma variant compared to pre-VOC variants. On the other hand, infections with the omicron variant were less severe compared to delta variant infections

Paediatric disease severity associated with SARS-CoV-2 VOC infections was described in 23 studies (supplementary tables 7-10). The alpha variant did not appear to result in more severe COVID-19 disease than disease caused by non-VOCs in children and adolescents in five studies.<sup>17-21</sup> In two studies reporting on paediatric inpatients and outpatients one from Brazil and one from the USA, the overall hospitalisation rate as well as the ICU admission rate of children infected with the gamma variant was higher than for non-VOCs (Gamma vs. non-VOC: 28.3% vs. 24.9%.<sup>47</sup>, Gamma vs. non-VOC: 5.2% vs. 1.2%<sup>48</sup>).<sup>47,48</sup> Severity of delta variant infection was compared with the pre-delta period (including periods where previous VOCs were predominant) in eight studies but the reported data were inconsistent, and differences in disease severity could not be assessed.<sup>26,28-30,32-35</sup> Studies of omicron variant infection described less severe disease than infection with the delta variant in children and adolescents <18 years old, based on data from nine studies from South Africa, Qatar and the USA.<sup>36,39-46</sup>

One study from Denmark analysed the symptoms and severity of disease experienced by children and adolescents younger than 17 years old, hospitalised for multi-inflammatory syndrome in children (MIS-C) during the delta and non-VOC predominant periods. The range of symptoms was similar in both periods, as was the proportion of children admitted to ICU (delta, 55% (28/51) vs. non-VOC 52% (12/23)).<sup>25</sup>



We did not find any studies showing an association between the SARS-CoV-2 omicron lineages and the global outbreak of paediatric hepatitis of unknown origin, which has been attributed to adenoviruses in spring 2022.<sup>49</sup>

No studies reported on how symptoms or severity differed between different paediatric age groups or compared children and adolescents infected with a VOC to adults infected with the same variant.

### [Review question 2: Risk factors for severe COVID-19 in children and adolescents infected with a SARS-CoV-2 VOC](#)

We found one article that used data from the National COVID-19 database in Qatar and compared risk factors for severe COVID-19 in children and adolescents infected with the omicron and delta variants. The study showed that children and adolescents <18 years old with  $\geq 1$  comorbidity (mostly chronic lung disease) were more likely to have moderate or severe disease than those without comorbidities if they were infected with the omicron lineage (aOR 95%CI 3.2, 1.1-9.0), but not if they were infected with the delta lineage.<sup>39</sup> One paper reported on risk factors for severe COVID-19 disease in children 5-11 years old during the whole pandemic period, including the time when the omicron variant became predominant. The study assessed several possible risk factors and found evidence of an increased risk of severe disease in children with diabetes or obesity.<sup>45</sup>

### [Review question 3: Risk of becoming infected with a SARS-CoV-2 VOC](#)

The risk of becoming infected with a SARS-CoV-2 VOC was analysed in time periods when the alpha, delta or omicron variants were predominant in 15 studies (supplementary table 11). Immunity due to previous infection or vaccination appeared to be a relevant factor in determining the risk of infection but these factors were poorly reported in the included studies. Some studies (4/15) summarised the vaccination status of the entire study sample, which ranged from an undefined proportion of partially vaccinated individuals to 70% fully vaccinated, without analysing it at the individual level for adults and children and adolescents.<sup>17,56-58</sup>

Six studies evaluated data from alpha variant outbreaks in daycare centres and compared the risk of infection between children and adults.<sup>14,18,50-53</sup> They generally showed a lower attack rate for infection with the alpha variant ranging from 0% to 27% for young children (mostly  $\leq 6$  years old) than for adults (0%-71%). However,

there were large variations in attack rates between different facilities or classes at the same facility. The study participants' vaccination status was not reported in any of these studies.

One study reported the attack rates of children by age group. The attack rates for young children ( $\leq 4$  years old) decreased with increasing age from 44% to 4%, with the highest rate for infants  $< 1$  year old.<sup>14</sup> The attack rates of older children (10-19 years old) and adults (30-39 years old) were similar in one study from Qatar, but the vaccination status was not reported.<sup>54</sup>

In one study analysing household transmission of the alpha variant in the USA, the risk of infection was high in both younger children  $\leq 11$  years old (78%, 95%CI: 51-76%) and older children and adolescents 12-17 years old (56%, 95%CI: 40-72%) with overlapping CIs.<sup>17</sup> Compared with the pre-VOC period, a similar or lower risk of infection was reported in three household or school studies for children and adolescents of all age groups when the alpha variant was predominant.<sup>17,18,50</sup>

However, in two studies from Israel, including a large hospital study, a higher risk of infection for the alpha variant than for non-VOCs was described for all paediatric age groups.<sup>16,19</sup> Data on the risk of infection during the delta predominant time period analysed in four studies comparing children and adolescents to adults were inconclusive.<sup>55-58</sup> Two of these four studies, one cohort study from Singapore and one from the UK found the risk of infection to be higher for younger children  $\leq 11$  years old/school-aged children 5-18 years old than for adults who were either completely or partially vaccinated.<sup>57,58</sup> . One study analysed the risk of infection in daycare centres during the Omicron predominant time period and found it to be slightly lower for young children 3-7 years old (44%) than for adults (50%). As described, during the alpha-predominant period large variations in attack rates (15.4%-61.1%) were observed between different school classes.<sup>59</sup>

#### [Review question 4: Risk of SARS-CoV-2 transmission from children and adolescent infected with a VOC](#)

The risk of SARS-CoV-2 transmission was evaluated in time periods when alpha, delta or omicron variants were predominant in 15 studies (supplementary table 12).

Overall, transmission risk with a VOC was reported to be higher for younger children in most studies. A higher risk of onward SARS-CoV-2 alpha variant transmission in

household settings from younger children <10 years old than from older children 10-19 years old and adults was found in four studies.<sup>52,61,62,64</sup> These studies did not report on whether the participating adults or older children were vaccinated. One household study from the USA found comparable transmission of alpha variant infections from children  $\leq 11$  years old compared with adolescents 12-17 years old (97% of whom were unvaccinated) (OR 1.37, 95% CI 0.61, 3.04).<sup>17</sup> The risk of transmission from children <10 years old with an alpha variant infection was found to be higher than from children with a pre-VOC or non-VOC infection in three studies.<sup>19,64,65</sup> One study found the transmission risk from 10-19 year olds with an alpha variant infection to be similar to that of pre-VOC infection.<sup>65</sup> Comparing the risk of onward transmission between age groups for participants infected with either the alpha or delta variant, the risk was similar for younger children <12 years old and lower for older children and adolescent 10-19 years old, compared with 30-39 year old adults.<sup>67,68</sup> One household transmission study from Singapore found the transmission risk of younger children  $\leq 11$  years old infected with the delta variant to be higher (25%) than the transmission risk of young adults 18-29 years old who were at least partially vaccinated (9%).<sup>56</sup> One study analysed the risk of onward transmission of young children  $\leq 6$  years old with an omicron variant infection in a daycare setting and found it to be lower (3/24, 12.5%) than the risk of onward transmission from adults (1/2, 50%).<sup>59</sup>

#### [Review question 5: Risk of long-term symptoms or signs following an infection with a SARS-CoV-2 VOC](#)

Few children reported long-term symptoms or signs of infection. The risk for children and adolescents experiencing symptoms longer than 28 days was similar for children infected with the alpha (12/694, 1.73%) and the delta lineage (15/706, 2.12%) in the UK, and was similar for younger (5-11 years old) compared to older (12-17 years old) children infected with the same variant.<sup>32</sup> For those children with longer illness duration, no new symptoms developed after day 28. A study comparing Danish children who tested positive for SARS-CoV-2 with a reference cohort of children who tested negative during the overall pandemic period (alpha and delta variant predominant times included) found that 0.12% (95%CI: 0.09%-0.15%) of children experienced symptoms for more than 28 days (58 of 48948 children).<sup>33</sup>

## Discussion

Children and adolescents (<20 years old) with a SARS-CoV-2 VOC infection mostly experienced mild disease and the symptoms experienced did not vary widely between VOCs. Compared to non-VOC and other VOC induced infections more severe infection was observed with either the delta or the gamma SARS-CoV-2 variant. Compared to otherwise healthy peers, children and adolescents with comorbidities appeared to have an increased risk of infection by omicron, but not delta, and diabetes and obesity were reported as risk factors for severe infection during the whole pandemic period. The studies reviewed suggest that the risk of SARS-CoV-2 infection in daycare centres was lower overall for younger children than for adults, while the risk compared to adults decreased with increasing age of the children. The transmission risk of SARS-CoV-2 from younger children infected with a VOC seemed to have been higher than that of older children and adults as well. The proportion of children and adolescents reporting symptoms more than 28 days after a SARS-CoV-2 VOC infection was low. Interpretation and generalisation of the evidence was limited by inconsistent reporting of age groups and by inadequate reporting of vaccination and other control measures in included studies.

## Strength and limitations

We used a systematic approach to search different databases, covering the period of VOC circulation that includes the first omicron variants (BA.1 and BA.2) in 2022. We included a broad selection of study designs in various languages and screened reference lists of included studies. Our search strategy might have missed relevant studies, although we only excluded three records for language reasons. A limitation of the review is that misclassification of the variant could have occurred as only a minority of study samples from all cases was sequenced in several studies and we relied on dates during which a variant was dominant. Non-differential misclassification would reduce the magnitude of associations with VOC infection status.

## Interpretation and implications of findings

The severity of SARS-CoV-2 infections, the risk of becoming infected and the risk of onward transmission depend on both intrinsic factors associated with the person (e.g. host immunity) and the pathogen (e.g. variant transmissibility, virulence,

immune evasion) and extrinsic factors (e.g. study setting, COVID-19 at the population level, vaccination status of study participants, preventive measures in place). Differentiation between the contributions of intrinsic and extrinsic factors in studies included in this review was challenging because frequent deficiencies in reporting of extrinsic factors hindered comparisons and interpretation of outcomes from different regions or different pandemic periods, even from the same country. All studies were conducted in high or upper-middle income countries, which might affect the generalisability of the review findings to children in settings with less-resourced health systems, lower vaccine coverage and different patterns of comorbidity and co-infection. We assessed the risk of bias using published tools for cohort and case-control studies but found that the selection bias was hard to assess, especially for studies addressing the symptoms and severity of disease in hospitalised populations, since reporting of indications for hospitalisation (especially for children) varied between countries and between different stages of the pandemic.<sup>10,11</sup>

#### Risk of exposure to, and transmission of, SARS-CoV-2

The risk of exposure to SARS-CoV-2 has a direct effect on the risk of becoming infected, which influences the risk of onward transmission. Younger children are more dependent on adult care takers, who were most likely to be the index case, than older children and adolescents. This increased risk of exposure to infected adults might explain their higher risk of becoming infected and for onward transmission compared to older children and adolescents. The risk of exposure to SARS-CoV-2 also influences the interpretation of the data on disease severity in children and adolescents with chronic diseases. We found an increased risk of severe disease for children with diabetes or obesity, but not for children and adolescents with respiratory conditions, except if they were infected with omicron.<sup>45</sup> As high-risk populations have been known to take additional measures to stay safe since the beginning of the pandemic, these findings could, however, also be partly explained by more intense shielding.<sup>69</sup>

## Vaccination status

Vaccines protecting people from severe COVID-19 were first licensed for adults at the end of 2020 at around the same time as the alpha VOC became widespread. These vaccines also reduced the risk of becoming infected with SARS-CoV-2 as well as the risk of transmitting it.<sup>4,70,71</sup> At more recent stages of the pandemic, such as when the omicron lineage first emerged, the original COVID-19 vaccine from Pfizer (Comirnaty) had become licensed for children  $\geq 5$  years old and offered protection from severe disease and at least partial protection from becoming infected and potentially from onward transmission.<sup>72-74</sup> Vaccine uptake, however, remained low for children in most countries. More importantly, a majority of countries with less financial resources and restricted access to health services have not received a sufficient number of vaccine doses to ensure high vaccination coverage even for healthcare workers and vulnerable elderly populations let alone for children and adolescents.<sup>75</sup> Irrespective of the prevalent SARS-CoV-2 lineage this low vaccine uptake and accessibility increased the risk of children and adolescents not only becoming infected themselves but of transmitting the disease to other children and adults. Vaccines for children  $< 5$  years old have only recently been licensed in countries with sufficient financial resources.<sup>76,77</sup> In addition to the increased care needs of younger children and thus their higher risk of potential exposure to COVID-19 infected adults, their higher risk of infection and onward transmission compared to older children and adolescents might also be explained by a difference in vaccination status.

## Recommendations for hospitalisation

Recommendations for hospitalisation (as a sign of at least moderate disease) and treatment guidelines for children and adolescents infected with COVID-19 were not standardised, either at the country level or internationally, have changed over the course of the pandemic and might differ between different hospitals within and between countries. These variations made it impossible to compare the prevalence of moderate and severe COVID-19 disease both between countries or between different pandemic periods in the same country, irrespective of the prevalent SARS-CoV-2 lineage.

## Conclusion

Children are susceptible to infection with a SARS-CoV-2 VOC and can transmit them. Overall patterns of SARS-CoV-2 caused by VOCs among children and adolescents appear similar to those observed in the pre-VOC period. Identification of characteristics associated with specific VOCs or VOC infections in certain age groups is challenged by the frequent lack of data reporting of contextual factors, including the vaccination status of included participants and levels of prevalent SARS-CoV-2. Further studies assessing age-related differences in the risk of infection, the risk of transmission as well as risk factors for severe disease and long-term symptoms or signs after SARS-CoV-2 VOC infection are needed globally. These studies should report the vaccination status of participating adults and children as well as any measures affecting transmission (exposure type and intensity) and hospitalisation (local guidelines) during the study period. The available data are from studies in higher income settings, where the population is not only assumed to have easier access to health services but where resources for surveillance and research are also more readily available than in low- and middle-income settings. Owing to a lack of access to vaccines and generally low vaccine coverage, children account for a largely unvaccinated part of the population, especially in low- and middle-income countries. Local data acquisition and dissemination about SARS-CoV-2 in children and adolescents remain important both for affected countries and worldwide as SARS-CoV-2 continues to mutate and spread.

## References

1. World Health Organization. Tracking SARS-CoV-2 variants 2022 [updated May 25 2022. Available from: <https://www.who.int/activities/tracking-SARS-CoV-2-variants>.
2. Thakur V, Bhola S, Thakur P, Patel SKS, Kulshrestha S, Ratho RK, et al. Waves and variants of SARS-CoV-2: understanding the causes and effect of the COVID-19 catastrophe. *Infection*. 2022;50(2):309-25.
3. Ssentongo P, Ssentongo AE, Voleti N, Groff D, Sun A, Ba DM, et al. SARS-CoV-2 vaccine effectiveness against infection, symptomatic and severe COVID-19: a systematic review and meta-analysis. *BMC Infect Dis*. 2022;22(1):439. doi: 10.1186/s12879-022-07418-y.
4. Luring AS, Tenforde MW, Chappell JD, Gaglani M, Ginde AA, McNeal T, et al. Clinical severity of, and effectiveness of mRNA vaccines against, covid-19 from omicron, delta, and alpha SARS-CoV-2 variants in the United States: prospective observational study. *BMJ*. 2022;376:e069761. doi: 10.1136/bmj-2021-069761.
5. Hunter DJ, Abdool Karim SS, Baden LR, Farrar JJ, Hamel MB, Longo DL, et al. Addressing Vaccine Inequity - Covid-19 Vaccines as a Global Public Good. *N Engl J Med*. 2022;386(12):1176-9.
6. Wiedenmann M, Goutaki M, Low N, Stringhini S, l'Huillier A. The role of children/adolescents in the SARS-CoV-2 pandemic with regards to variants of concern: a rapid review PROSPERO 2022 CRD42022295207 2022 [Available from: [https://www.crd.york.ac.uk/prospero/display\\_record.php?RecordID=295207](https://www.crd.york.ac.uk/prospero/display_record.php?RecordID=295207).
7. Wiedenmann M, Goutaki M, Keiser O, Stringhini S, Tanner M, Low N. The role of children and adolescents in the SARS-CoV-2 pandemic: a rapid review. *Swiss Med Wkly*. 2021;151:w30058.
8. PRISMA, Transparent Reporting of Systematic Reviews and Meta-Analyses. PRISMA Checklist 2021 [Available from: <https://prisma-statement.org/PRISMAStatement/Checklist>.]
9. COVID-19 Open Access Project. (2021). *Living Evidence on COVID-19*. Retrieved from <https://ispmbern.github.io/covid-19/living-review/>
10. CLARITY Group at McMaster University. Tool to Assess Risk of Bias in Cohort Studies [Available from: <https://www.evidencepartners.com/wp-content/uploads/2021/03/Tool-to-Assess-Risk-of-Bias-in-Cohort-Studies-DistillerSR.pdf>.
11. CLARITY Group at McMaster University. Tool to Assess Risk of Bias in Case Control Studies [Available from: <https://www.evidencepartners.com/wp-content/uploads/2021/03/Tool-to-Assess-Risk-of-Bias-in-Case-Control-Studies-DistillerSR.pdf>.
12. Jaime Caro J, Eddy DM, Kan H, Kaltz C, Patel B, Eldessouki R, et al. Questionnaire to assess relevance and credibility of modeling studies for informing health care decision making: an ISPOR-AMCP-NPC Good Practice Task Force report. *Value Health*. 2014;17(2):174-82. doi: 10.1016/j.jval.2014.01.003.



13. The World Bank. Data for High income, Low income, Lower middle income, Upper middle income [Available from: <https://data.worldbank.org/?locations=XD-XM-XN-XT>].
14. Roberts RJ, Brooker A, Lakshman R. Outbreak of SARS-CoV-2 in a Children's Nursery in the United Kingdom. *Pediatr Infect Dis J*. 2021;40(12):e455-e8. doi: 10.1097/INF.0000000000003362.
15. Ulyte A, Radtke T, Abela IA, Haile SR, Ammann P, Berger C, et al. Evolution of SARS-CoV-2 seroprevalence and clusters in school children from June 2020 to April 2021: prospective cohort study Ciao Corona. *Swiss Med Wkly*. 2021;151:w30092. doi: 10.4414/smw.2021.w30092.
16. Somekh I, Sharabi A, Dory Y, Simoes EAF, Somekh E. Intrafamilial Spread and Altered Symptomatology of SARS-CoV-2, During Predominant Circulation of Lineage B.1.1.7 Variant in Israel. *Pediatr Infect Dis J*. 2021;40(8):e310-e1. doi: 10.1097/INF.0000000000003167.
17. Waltenburg MA, Whaley MJ, Chancey RJ, Donnelly MAP, Chuey MR, Soto R, et al. Household Transmission and Symptomology of Severe Acute Respiratory Syndrome Coronavirus 2 Alpha Variant Among Children-California and Colorado, 2021. *J Pediatr*. 2022.
18. Nakel J, Robitaille A, Gunther T, Rosenau L, Czech-Sioli M, Plenge-Bonig A, et al. Comparing susceptibility and contagiousness in concurrent outbreaks with a non-VOC and the VOC SARS-CoV-2 variant B.1.1.7 in daycare centers in Hamburg, Germany. *Int J Hyg Environ Health*. 2022;240:113928. doi: 10.1016/j.ijheh.2022.113928.
19. Somekh I, Stein M, Karakis I, Simoes EAF, Somekh E. Characteristics of SARS-CoV-2 Infections in Israeli Children During the Circulation of Different SARS-CoV-2 Variants. *JAMA Netw Open*. 2021;4(9):e2124343. doi: 10.1001/jamanetworkopen.2021.24343.
20. Swann OV, Pollock L, Holden KA, Munro APS, Bennett A, Williams TC, et al. Comparison of UK paediatric SARS-CoV-2 admissions across the first and second pandemic waves. *Pediatr Res*. 2022. doi: 10.1038/s41390-022-02052-5.
21. Brookman S, Cook J, Zucherman M, Broughton S, Harman K, Gupta A. Effect of the new SARS-CoV-2 variant B.1.1.7 on children and young people. *Lancet Child Adolesc Health*. 2021;5(4):e9-e10. doi: 10.1016/S2352-4642(21)00030-4.
22. Stewart DJ, Mudalige NL, Johnson M, Shroff R, du Pre P, Stojanovic J. Acute kidney injury in paediatric inflammatory multisystem syndrome temporally associated with SARS-CoV-2 (PIMS-TS) is not associated with progression to chronic kidney disease. *Arch Dis Child*. 2022;107(3):e21. doi: 10.1136/archdischild-2021-322866.
23. Li H, Lin H, Chen X, Li H, Li H, Lin S, et al. Unvaccinated Children Are an Important Link in the Transmission of SARS-CoV-2 Delta Variant (B1.617.2): Comparative Clinical Evidence From a Recent Community Surge. *Front Cell Infect Microbiol*. 2022;12:814782. doi: 10.3389/fcimb.2022.814782.
24. Hao J, Hu XC, Fan MX, Chen J, Cheng QR, Li Z, et al. Analysis of clinical characteristics of 66 pediatric patients with B.1.617.2 (Delta) variant of COVID-19. *World J Pediatr*. 2022;18(5):343-9.

25. Nygaard U, Holm M, Hartling UB, Glenthoj J, Schmidt LS, Nordly SB, et al. Incidence and clinical phenotype of multisystem inflammatory syndrome in children after infection with the SARS-CoV-2 delta variant by vaccination status: a Danish nationwide prospective cohort study. *Lancet Child Adolesc Health*. 2022;6(7):459-65.
26. Murillo-Zamora E, Trujillo X, Huerta M, Rios-Silva M, Baltazar-Rodriguez LM, Guzman-Esquivel J, et al. Decreased risk of COVID-19 pneumonia in children and adolescents during the Delta variant emergence. *Public Health*. 2022;204:9-11. doi: 10.1016/j.puhe.2021.12.017.
27. Ryu BH, Hong SI, Lim SJ, Cho Y, Hong KW, Bae IG, et al. Features of COVID-19 Among Children and Adolescents Without Risk Factors Before and After the Delta Variant Outbreak in South Korea. *Pediatr Infect Dis J*. 2022;41(1):e34-e5. doi: 10.1097/INF.0000000000003394.
28. Fisman DN, Tuite AR. Age-Specific Changes in Virulence Associated with SARS-CoV-2 Variants of Concern. *Clin Infect Dis*. 2022. doi: 10.1093/cid/ciac174.
29. Shoji K, Akiyama T, Tsuzuki S, Matsunaga N, Asai Y, Suzuki S, et al. Comparison of the clinical characteristics and outcomes of COVID-19 in children before and after the emergence of Delta variant of concern in Japan. *J Infect Chemother*. 2022;28(4):591-4. doi: 10.1016/j.jiac.2022.01.009.
30. Martin B, DeWitt PE, Russell S, Anand A, Bradwell KR, Bremer C, et al. Characteristics, Outcomes, and Severity Risk Factors Associated With SARS-CoV-2 Infection Among Children in the US National COVID Cohort Collaborative. *JAMA Netw Open*. 2022;5(2):e2143151. doi: 10.1001/jamanetworkopen.2021.43151.
31. Butt AA, Dargham SR, Chemaitelly H, Al Khal A, Tang P, Hasan MR, et al. Severity of Illness in Persons Infected With the SARS-CoV-2 Delta Variant vs Beta Variant in Qatar. *JAMA Intern Med*. 2022;182(2):197-205. doi: 10.1001/jamainternmed.2021.7949.
32. Molteni E, Sudre CH, Canas LS, Bhopal SS, Hughes RC, Chen L, et al. Illness characteristics of COVID-19 in children infected with the SARS-CoV-2 Delta variant. *MedRxiv*. 2021. doi: 10.1101/2021.10.06.21264467.
33. Kildegaard H, Lund LC, Hojlund M, Stensballe LG, Pottgard A. Risk of adverse events after covid-19 in Danish children and adolescents and effectiveness of BNT162b2 in adolescents: cohort study. *BMJ*. 2022;377:e068898.
34. Yilmaz Celebi M, Kiymet E, Boncuoglu E, Sahinkaya S, Cem E, Duzgol M, et al. Evaluation of childhood hospitalization rates and degree of severity of SARS-CoV-2 variants, including B.1.1.7 (Alpha), B.1.315/P.1 (Beta/Gamma), and B.1.617.2 (Delta). *J Med Virol*. 2022;94(5):2050-4. doi: 10.1002/jmv.27587.
35. Edward PR, Lorenzo-Redondo R, Reyna ME, Simons LM, Hultquist JF, Patel AB, et al. Severity of Illness Caused by Severe Acute Respiratory Syndrome Coronavirus 2 Variants of Concern in Children: A Single-Center Retrospective Cohort Study. *medRxiv*. 2021. doi: 10.1101/2021.10.23.21265402.
36. Cloete J, Kruger A, Masha M, du Plessis NM, Mawela D, Tshukudu M, et al. Paediatric hospitalisations due to COVID-19 during the first SARS-CoV-2 omicron (B.1.1.529) variant wave in South Africa: a multicentre observational study. *Lancet Child Adolesc Health*. 2022. doi: 10.1016/S2352-4642(22)00027-X.

37. Brewster RC, Parsons C, Laird-Gion J, Hilker S, Irwin M, Sommerschild A, et al. COVID-19-Associated Croup in Children. *Pediatrics*. 2022;149(6).
38. Ludvigsson JF. Convulsions in children with COVID-19 during the Omicron wave. *Acta Paediatr*. 2022. doi: 10.1111/apa.16276.
39. Butt AA, Dargham SR, Loka S, Shaik RM, Chemaitelly H, Tang P, et al. COVID-19 Disease Severity in Children Infected with the Omicron Variant. *Clin Infect Dis*. 2022.
40. Fowlkes AL, Yoon SK, Lutrick K, Gwynn L, Burns J, Grant L, et al. Effectiveness of 2-Dose BNT162b2 (Pfizer BioNTech) mRNA Vaccine in Preventing SARS-CoV-2 Infection Among Children Aged 5-11 Years and Adolescents Aged 12-15 Years - PROTECT Cohort, July 2021-February 2022. *MMWR Morb Mortal Wkly Rep*. 2022;71(11):422-8.
41. Wang L, Berger NA, Kaelber DC, Davis PB, Volkow ND, Xu R. COVID infection severity in children under 5 years old before and after Omicron emergence in the US. *medRxiv*. 2022. doi: 10.1101/2022.01.12.22269179.
42. Wang L, Berger NA, Kaelber DC, Davis PB, Volkow ND, Xu R. COVID infection rates, clinical outcomes, and racial/ethnic and gender disparities before and after Omicron emerged in the US. *medRxiv*. 2022. doi: 10.1101/2022.02.21.22271300.
43. Marks KJ, Whitaker M, Anglin O, Milucky J, Patel K, Pham H, et al. Hospitalizations of Children and Adolescents with Laboratory-Confirmed COVID-19 - COVID-NET, 14 States, July 2021-January 2022. *MMWR Morb Mortal Wkly Rep*. 2022;71(7):271-8. doi: 10.15585/mmwr.mm7107e4.
44. Iuliano AD, Brunkard JM, Boehmer TK, Peterson E, Adjei S, Binder AM, et al. Trends in Disease Severity and Health Care Utilization During the Early Omicron Variant Period Compared with Previous SARS-CoV-2 High Transmission Periods - United States, December 2020-January 2022. *MMWR Morb Mortal Wkly Rep*. 2022;71(4):146-52. doi: 10.15585/mmwr.mm7104e4.
45. Shi DS, Whitaker M, Marks KJ, Anglin O, Milucky J, Patel K, et al. Hospitalizations of Children Aged 5-11 Years with Laboratory-Confirmed COVID-19 - COVID-NET, 14 States, March 2020-February 2022. *MMWR Morb Mortal Wkly Rep*. 2022;71(16):574-81. doi: 10.15585/mmwr.mm7116e1.
46. Marks KJ, Whitaker M, Agathis NT, Anglin O, Milucky J, Patel K, et al. Hospitalization of Infants and Children Aged 0-4 Years with Laboratory-Confirmed COVID-19 - COVID-NET, 14 States, March 2020-February 2022. *MMWR Morb Mortal Wkly Rep*. 2022;71(11):429-36.
47. Oliveira EA, Simoes ESAC, Oliveira MCL, Colosimo EA, Mak RH, Vasconcelos MA, et al. Comparison of the First and Second Waves of the Coronavirus Disease 2019 (COVID-19) Pandemic in Children and Adolescents in a Middle-Income Country: Clinical Impact Associated with Severe Acute Respiratory Syndrome Coronavirus 2 (SARS-CoV-2) Gamma Lineage. *J Pediatr*. 2022. doi: 10.1016/j.jpeds.2022.01.001.
48. Edward PR, Lorenzo-Redondo R, Reyna ME, Simons LM, Hultquist JF, Patel AB, et al. Severity of Illness Caused by Severe Acute Respiratory Syndrome Coronavirus 2 Variants of Concern in Children: A Single-Center Retrospective Cohort Study. *medRxiv*. 2021. doi: 10.1101/2021.10.23.21265402.

49. Baker JM, Buchfellner M, Britt W, Sanchez V, Potter JL, Ingram LA, et al. Acute Hepatitis and Adenovirus Infection Among Children - Alabama, October 2021-February 2022. *MMWR Morb Mortal Wkly Rep.* 2022;71(18):638-40.
50. Schenk B, Hoehl S, Rudych O, Menger D, Farmand S, Wrobel F, et al. Longitudinal testing for SARS-CoV-2 RNA in day care centers in Hesse, Germany, during increased local incidence and with VOC Alpha as dominant variant: Results of the SAFE KiDS 2 and SAFE KiDS 3 study. *MedRxiv.* 2021. doi: 10.1101/2021.06.29.21259633.
51. Neuberger F, Grgic M, Diefenbacher S, Spensberger F, Lehfeld A-S, Buchholz U, et al. COVID-19 infections in day care centres in Germany: Social and organizational determinants of infections in children and staff in the second and third wave of the pandemic. *MedRxiv.* 2021. doi: 10.1101/2021.06.07.21257958.
52. Loenenbach A, Markus I, Lehfeld AS, An der Heiden M, Haas W, Kiegele M, et al. SARS-CoV-2 variant B.1.1.7 susceptibility and infectiousness of children and adults deduced from investigations of childcare centre outbreaks, Germany, 2021. *Euro Surveill.* 2021;26(21). doi: 10.2807/1560-7917.ES.2021.26.21.2100433.
53. Lorthe E, Bellon M, Michielin G, Berthelot J, Zaballa M-E, Pennacchio F, et al. Epidemiological, virological and serological investigation into a SARS-CoV-2 outbreak (Alpha variant) in a primary school: a prospective longitudinal study. *medRxiv.* 2021. doi: 10.1101/2021.10.26.21265509.
54. Abu-Raddad LJ, Chemaitelly H, Ayoub HH, Coyle P, Malek JA, Ahmed AA, et al. Introduction and expansion of the SARS-CoV-2 B.1.1.7 variant and reinfections in Qatar: A nationally representative cohort study. *PLoS Med.* 2021;18(12):e1003879. doi: 10.1371/journal.pmed.1003879.
55. Clifford S, Waight P, Hackman J, Hué S, Gower CM, Kirsebom FCM, et al. Effectiveness of BNT162b2 and ChAdOx1 against SARS-CoV-2 household transmission - a prospective cohort study in England. *MedRxiv.* 2021. doi: 10.1101/2021.11.24.21266401.
56. Ng OT, Koh V, Chiew CJ, Marimuthu K, Thevasagayam NM, Mak TM, et al. Impact of SARS-CoV-2 Vaccination and Paediatric Age on Delta Variant Household Transmission. *Clin Infect Dis.* 2022.
57. Dougherty K, Mannell M, Naqvi O, Matson D, Stone J. SARS-CoV-2 B.1.617.2 (Delta) Variant COVID-19 Outbreak Associated with a Gymnastics Facility - Oklahoma, April-May 2021. *MMWR Morb Mortal Wkly Rep.* 2021;70(28):1004-7. doi: 10.15585/mmwr.mm7028e2.
58. Singanayagam A, Hakki S, Dunning J, Madon KJ, Crone MA, Koycheva A, et al. Community transmission and viral load kinetics of the SARS-CoV-2 delta (B.1.617.2) variant in vaccinated and unvaccinated individuals in the UK: a prospective, longitudinal, cohort study. *Lancet Infect Dis.* 2022;22(2):183-95. doi: 10.1016/S1473-3099(21)00648-4.
59. Lorthe E, Bellon M, Berthelot J, Michielin G, L'Huillier AG, Posfay-Barbe KM, et al. A SARS-CoV-2 omicron (B.1.1.529) variant outbreak in a primary school in Geneva, Switzerland. *Lancet Infect Dis.* 2022;22(6):767-8.

60. Lindstrom JC, Engebretsen S, Kristoffersen AB, Ro GOI, Palomares AD, Engo-Monsen K, et al. Increased transmissibility of the alpha SARS-CoV-2 variant: evidence from contact tracing data in Oslo, January to February 2021. *Infectious diseases (London, England)*. 2022;54(1):72-7. doi: 10.1080/23744235.2021.1977382.
61. Lyngse FP, Molbak K, Skov RL, Christiansen LE, Mortensen LH, Albertsen M, et al. Increased transmissibility of SARS-CoV-2 lineage B.1.1.7 by age and viral load. *Nat Commun*. 2021;12(1):7251. doi: 10.1038/s41467-021-27202-x.
62. Chudasama DY, Flannagan J, Collin SM, Charlett A, Twohig KA, Lamagni T, et al. Household clustering of SARS-CoV-2 variant of concern B.1.1.7 (VOC-202012-01) in England. *J Infect*. 2021;83(1):e26-e8. doi: 10.1016/j.jinf.2021.04.029.
63. Julin CH, Robertson AH, Hungnes O, Tunheim G, Bekkevold T, Laake I, et al. Household Transmission of SARS-CoV-2: A Prospective Longitudinal Study Showing Higher Viral Load and Increased Transmissibility of the Alpha Variant Compared to Previous Strains. *Microorganisms*. 2021;9(11). doi: 10.3390/microorganisms9112371.
64. Loss J, Wurm J, Varnaccia G, Schienkiewitz A, Iwanowski H, Loer A-KM, et al. Transmission of SARS-CoV-2 among children and staff in German daycare centers: results from the COALA study. *MedRxiv*. 2021. doi: 10.1101/2021.12.21.21268157.
65. Buchan SA, Tibebu S, Daneman N, Whelan M, Vanniyasingam T, Murti M, et al. Increased Household Secondary Attacks Rates With Variant of Concern Severe Acute Respiratory Syndrome Coronavirus 2 Index Cases. *Clin Infect Dis*. 2022;74(4):703-6. doi: 10.1093/cid/ciab496.
66. Ratmann O, Bhatt S, Flaxman S. Implications of a highly transmissible variant of SARS-CoV-2 for children. *Arch Dis Child*. 2021;106(9):e37. doi: 10.1136/archdischild-2021-321903.
67. Allen H, Vusirikala A, Flannagan J, Twohig KA, Zaidi A, Chudasama D, et al. Household transmission of COVID-19 cases associated with SARS-CoV-2 delta variant (B.1.617.2): national case-control study. *Lancet Reg Health Eur*. 2022;12:100252. doi: 10.1016/j.lanepe.2021.100252.
68. Trobajo-Sanmartin C, Martinez-Baz I, Miqueleiz A, Fernandez-Huerta M, Burgui C, Casado I, et al. Differences in Transmission between SARS-CoV-2 Alpha (B.1.1.7) and Delta (B.1.617.2) Variants. *Microbiol Spectr*. 2022;10(2):e0000822.
69. Pedersen ESL, Collaud ENR, Mozun R, Dexter K, Kruljac C, Silberschmidt H, et al. Facemask Usage Among People With Primary Ciliary Dyskinesia During the COVID-19 Pandemic: A Participatory Project. *Int J Public Health*. 2021;66:1604277.
70. Lin DY, Gu Y, Wheeler B, Young H, Holloway S, Sunny SK, et al. Effectiveness of Covid-19 Vaccines over a 9-Month Period in North Carolina. *N Engl J Med*. 2022;386(10):933-41.
71. Eyre DW, Taylor D, Purver M, Chapman D, Fowler T, Pouwels KB, et al. Effect of Covid-19 Vaccination on Transmission of Alpha and Delta Variants. *N Engl J Med*. 2022;386(8):744-56.
72. Price AM, Olson SM, Newhams MM, Halasa NB, Boom JA, Sahni LC, et al. BNT162b2 Protection against the Omicron Variant in Children and Adolescents. *N Engl J Med*. 2022;386(20):1899-909.

73. Tan SHX, Cook AR, Heng D, Ong B, Lye DC, Tan KB. Effectiveness of BNT162b2 Vaccine against Omicron in Children 5 to 11 Years of Age. *N Engl J Med.* 2022;387(6):525-32.
74. Sacco C, Del Manso M, Mateo-Urdiales A, Rota MC, Petrone D, Riccardo F, et al. Effectiveness of BNT162b2 vaccine against SARS-CoV-2 infection and severe COVID-19 in children aged 5-11 years in Italy: a retrospective analysis of January-April, 2022. *Lancet.* 2022;400(10346):97-103.
75. Hunter DJ, Abdool Karim SS, Baden LR, Farrar JJ, Hamel MB, Longo DL, et al. Addressing Vaccine Inequity - Covid-19 Vaccines as a Global Public Good. *N Engl J Med.* 2022;386(12):1176-9.
76. Food and Drug Administration. Coronavirus (COVID-19) Update: FDA Authorizes Moderna and Pfizer-BioNTech COVID-19 Vaccines for Children Down to 6 Months of Age 2022 [Available from: <https://www.fda.gov/news-events/press-announcements/coronavirus-covid-19-update-fda-authorizes-moderna-and-pfizer-biontech-covid-19-vaccines-children>.]
77. GOV.UK. Pfizer/BioNTech COVID-19 vaccine authorised for use in infants and children aged 6 months to 4 years 2022 [Available from: <https://www.gov.uk/government/news/pfizerbiontech-covid-19-vaccine-authorised-for-use-in-infants-and-children-aged-6-months-to-4-years>.]

## Acknowledgements

We would like to thank all members of WHO's Maternal, Newborn, Child and Adolescent Health and Ageing department, who contributed to the development of this review: Kathleen Strong, Theresa Diaz, Anshu Banerjee, Maria van Kerkhove, Abdi Mahamud, Valentina Baltag, Judith Ann Mandelbaum-Schmid.

## Author contributions

MW, NL and MG conceived and designed the review. MW, LH and MG performed the literature search. MW, ML, MI, LAC, NP, YTL, MIA, ALH, IZ, LH and MG screened the articles for relevance and extracted the data. MW, MG and NL adjudicated as third reviewers in case of disagreements during the screening and extraction. MW, MI, LAC and MG synthesised the data. MW, MI, LAC, LH, NP, YTL, MIA, ALH, NL and MG all discussed the interpretation of the findings. MW and MG wrote the first draft of the manuscript. MI, LAC, NP, YTL, MIA, ALH, LH and NL all reviewed and revised the manuscript and approved the final version.

## Conflict of interest

MW, MI, LAC, NP, YTL, MIA, ALH, IZ, LH, MG and NL declare no conflict of interest.

## Funding

MW received funding from the World Health Organization (purchase order: 202807927). MIA received the Erasmus Mundus Excellence Scholarship for a European Master of Public Health (2018-2020). He also received subsistence allowance from WHO HQ during an internship and is now receiving a salary from WHO Bangladesh. NL received funds from the Swiss National Science Foundation (project number 176233) and European Union Horizon 2020 research and innovation programme - project EpiPose (grant agreement number 101003688). MG received grants from the Swiss National Science Foundation Ambizione fellowship (PZ00P3\_185923) as well as from the Fondation Johanna Dürmüller-Bol.

## Data availability

No datasets were generated. Data sharing is thus not applicable.

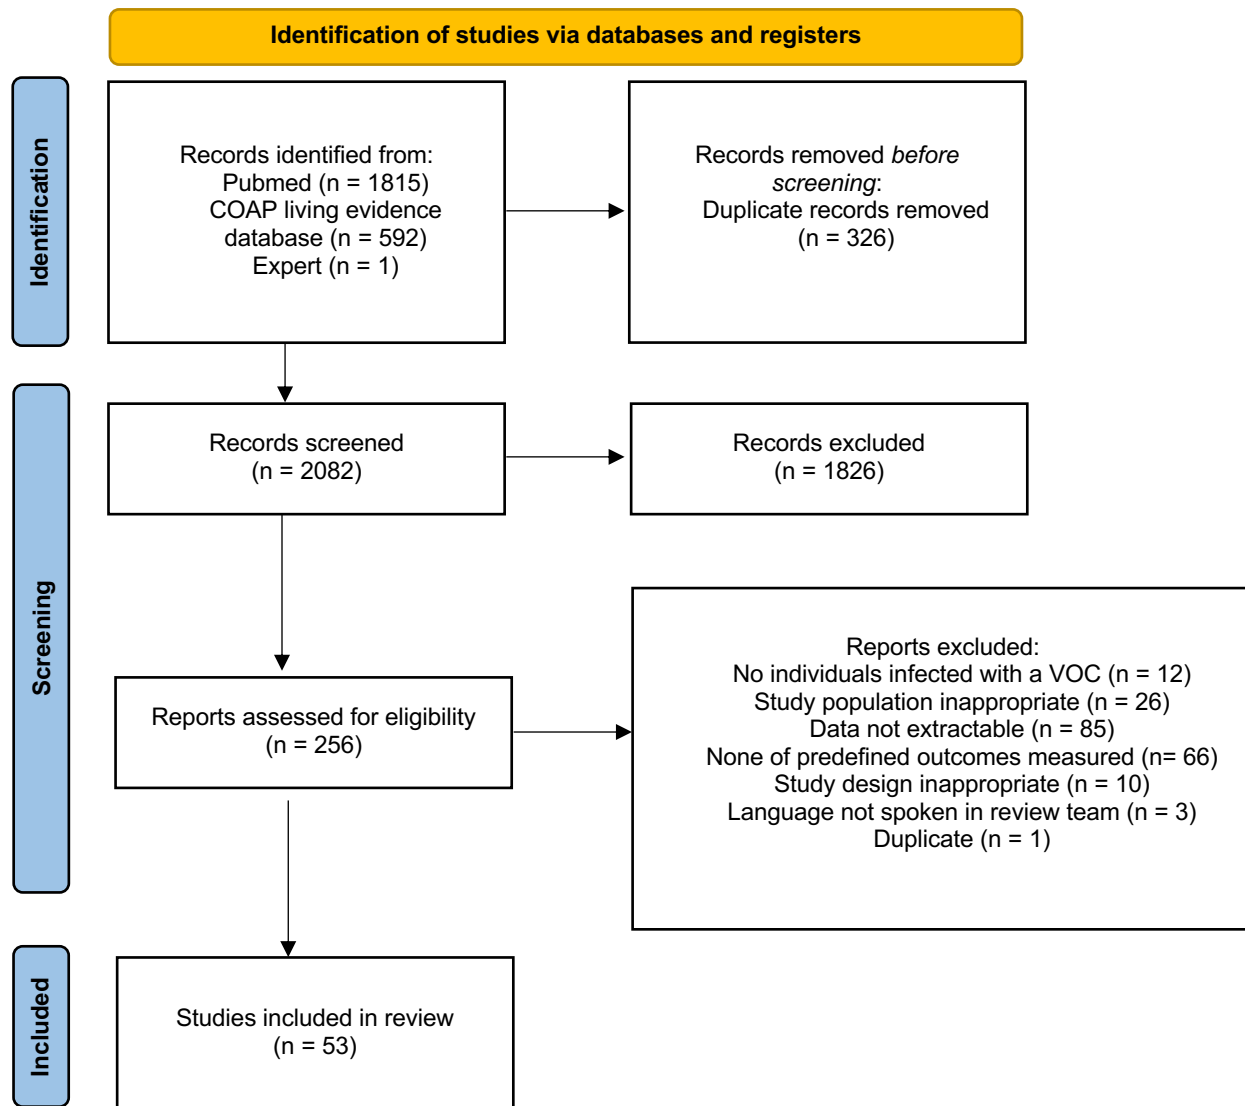

**Figure 1: Flow chart**

Of the 2407 studies found via database searches 53 were found to be eligible for this systematic review (incl. 1 study recommended to us by experts).

From: Page MJ, McKenzie JE, Bossuyt PM, Boutron I, Hoffmann TC, Mulrow CD, et al. The PRISMA 2020 statement: an updated guideline for reporting systematic reviews. *BMJ* 2021;372:n71. doi: 10.1136/bmj.n71

For more information, visit: <http://www.prisma-statement.org/>



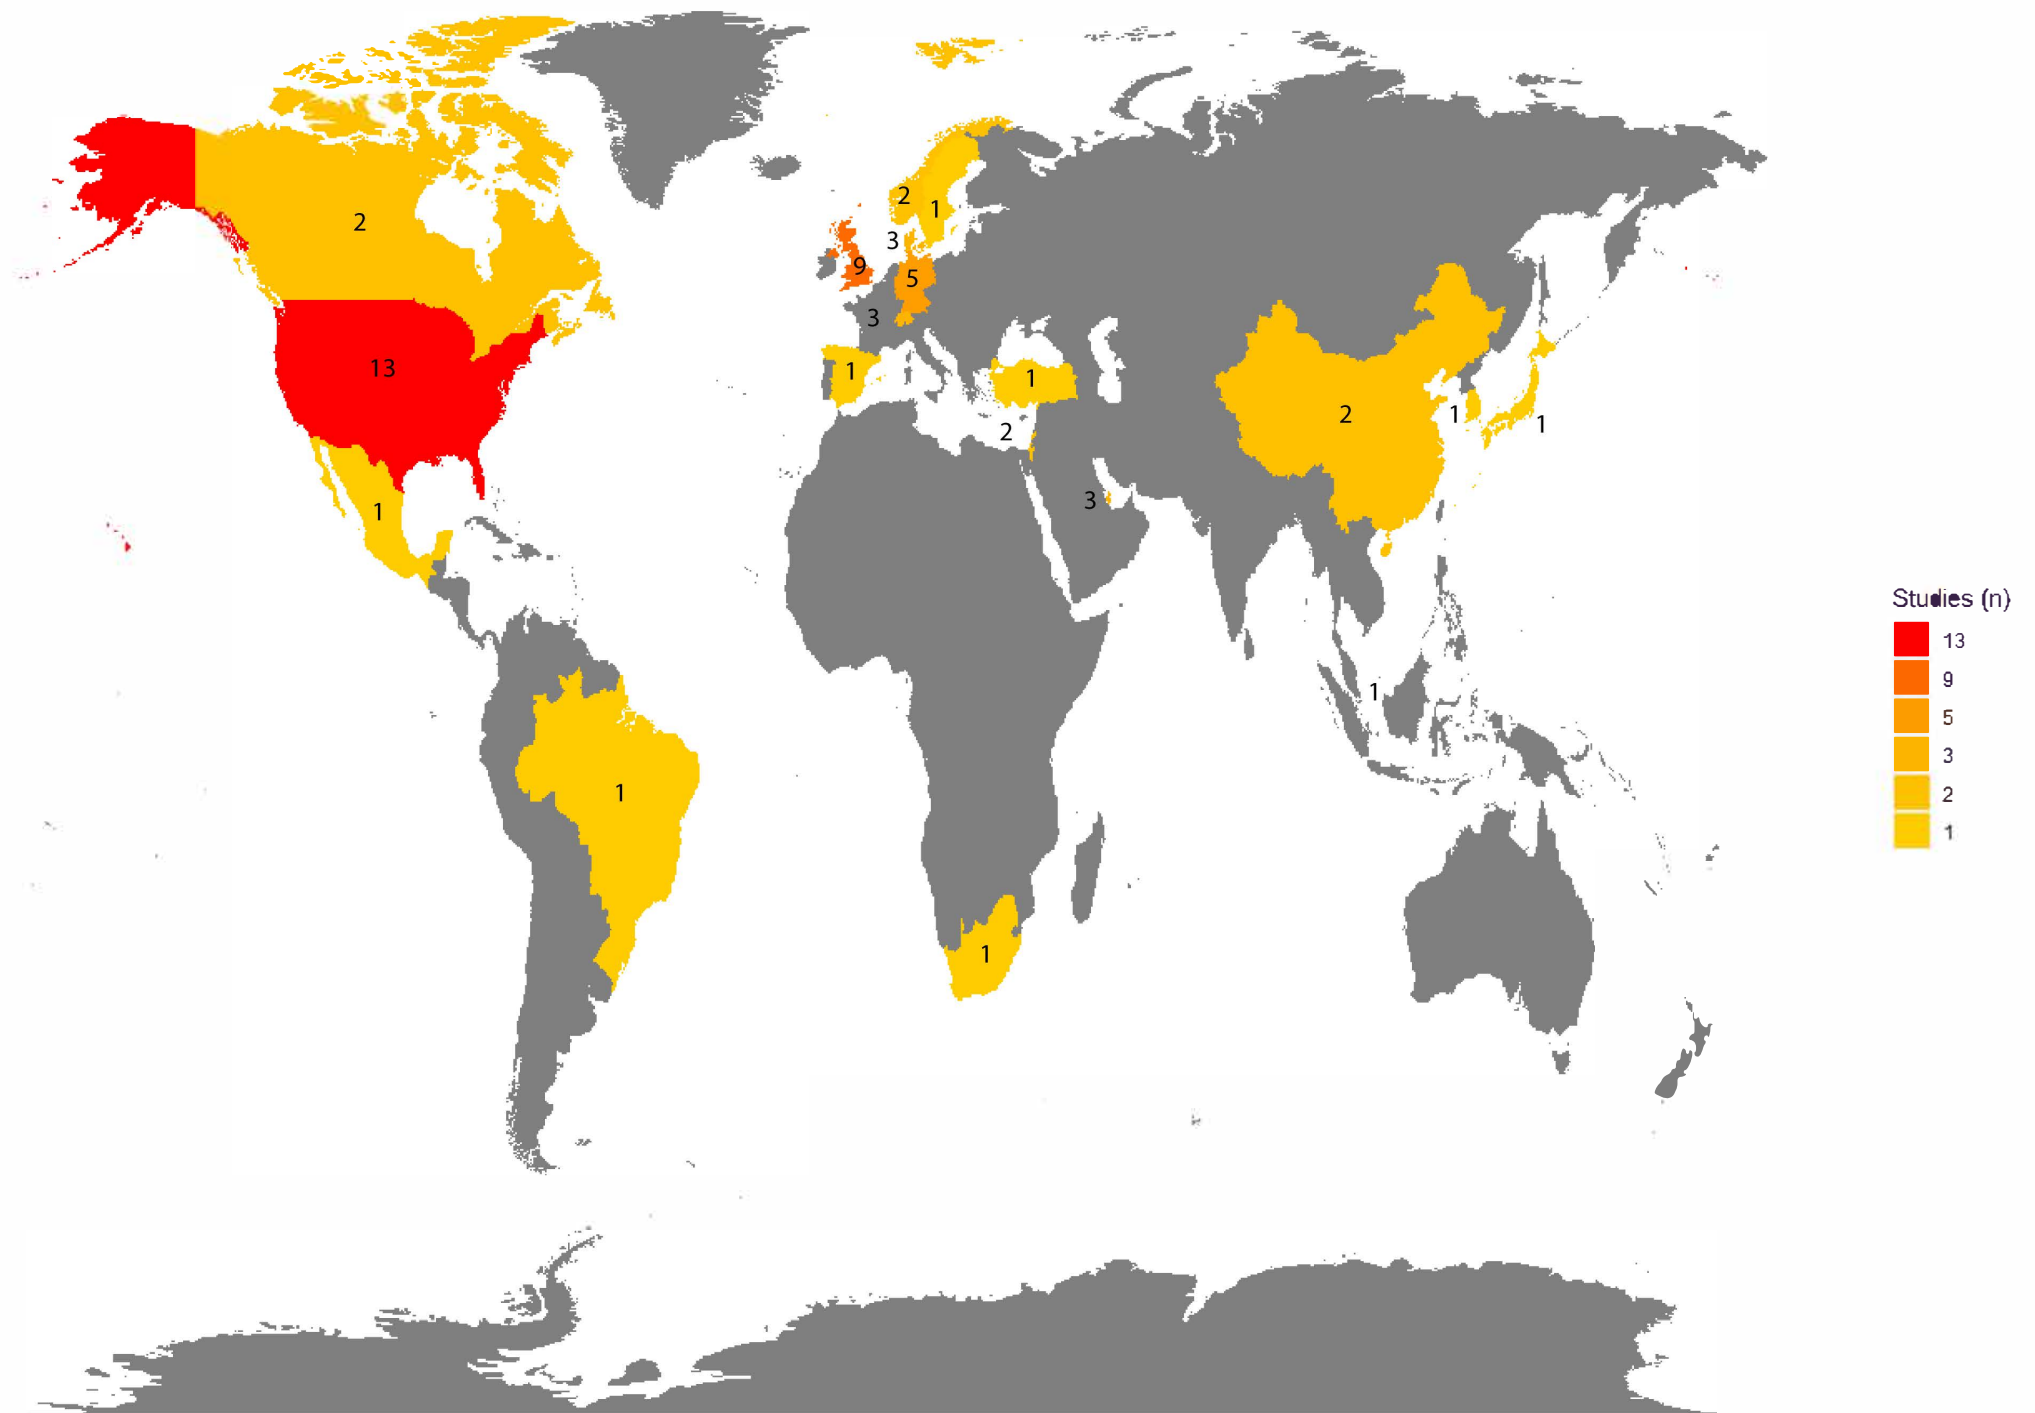

**Figure 2. Map of the number of studies conducted in each country**

Most studies came from high-income countries (n = 47, 89%). 6 studies (11%) were from upper-middle income countries.

**Table 1: Characteristics of included studies**

| <b>Characteristics</b>                                | <b>total</b> | <b>alpha</b> | <b>beta</b> | <b>gamma</b> | <b>delta</b> | <b>omicron</b> |
|-------------------------------------------------------|--------------|--------------|-------------|--------------|--------------|----------------|
| Number of studies, n*                                 | 53           | 27           | 2           | 2            | 27           | 12             |
| Review question addressed, n*                         |              |              |             |              |              |                |
| - Review question no. 1                               | 35           | 13           | 2           | 2            | 21           | 11             |
| - review question no. 2                               | 2            | 1            | 1           | 1            | 2            | 2              |
| - review question no. 3                               | 15           | 10           | -           | -            | 4            | 1              |
| - review question no. 4                               | 15           | 13           | -           | -            | 3            | 1              |
| - review question no. 5                               | -            | 2            | 1           | 1            | 2            | -              |
| Study design                                          |              |              |             |              |              |                |
| - cohort                                              | 44           | 21           | 2           | 2            | 24           | 9              |
| - case-control                                        | 3            | 3            | -           | -            | -            | -              |
| - cross-sectional                                     | 4            | 2            | -           | -            | 3            | 2              |
| - modelling                                           | 1            | 1            | -           | -            | -            | -              |
| - case series                                         | 1            | -            | -           | -            | -            | 1              |
| Income category according to world bank categories, n |              |              |             |              |              |                |
| - high income                                         | 47           | 26           | 1           | 1            | 23           | 11             |
| - upper middle income                                 | 6            | 1            | 1           | 1            | 4            | 1              |
| - lower middle income                                 | -            | -            | -           | -            | -            | -              |
| - low income                                          | -            | -            | -           | -            | -            | -              |

\* The total number of studies included is 53. The added number for each VOC is more than 53 as some studies reported on more than just one VOC.
