# Supplementary material for: The role of SARS-CoV-2 variants of concern in children and adolescents with COVID-19: a systematic review
Source: bioRxiv or medRxiv preprint supplement (doi:10.1101/2023.01.12.23284434), 2023-01-12
Supplement: Supplementary file [file media-4.pdf]

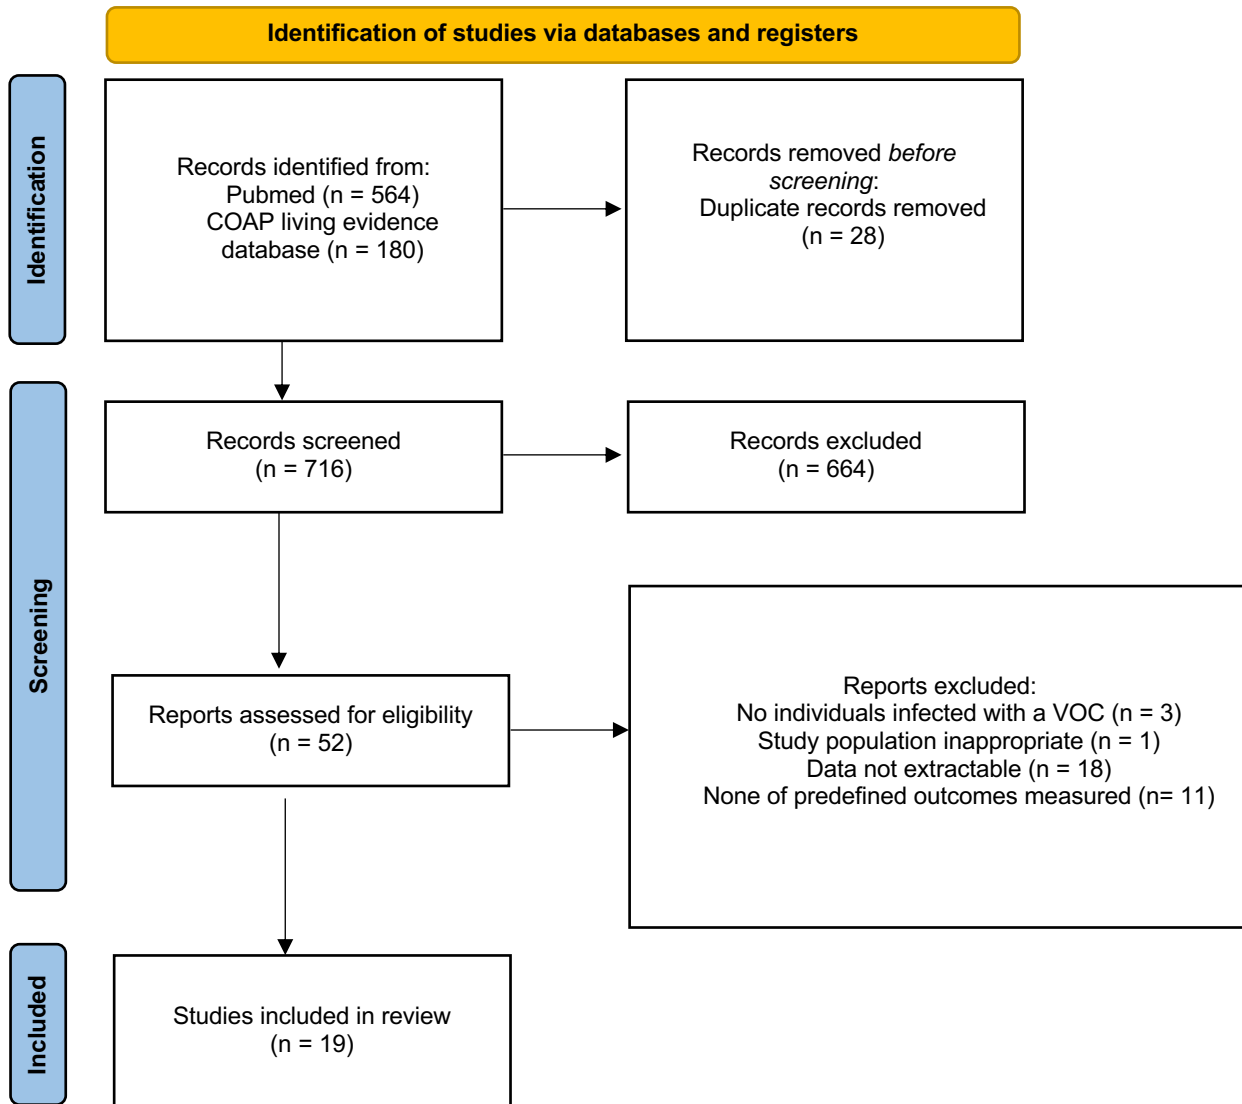

**Supplementary figure 1: Flow chart – first search (until 15.10.2021)**

Of the 744 studies found via database searches 19 were found to be eligible for this systematic review.
