# Supplementary material for: The role of SARS-CoV-2 variants of concern in children and adolescents with COVID-19: a systematic review
Source: bioRxiv or medRxiv preprint supplement (doi:10.1101/2023.01.12.23284434), 2023-01-12
Supplement: Supplementary file [file media-6.pdf]

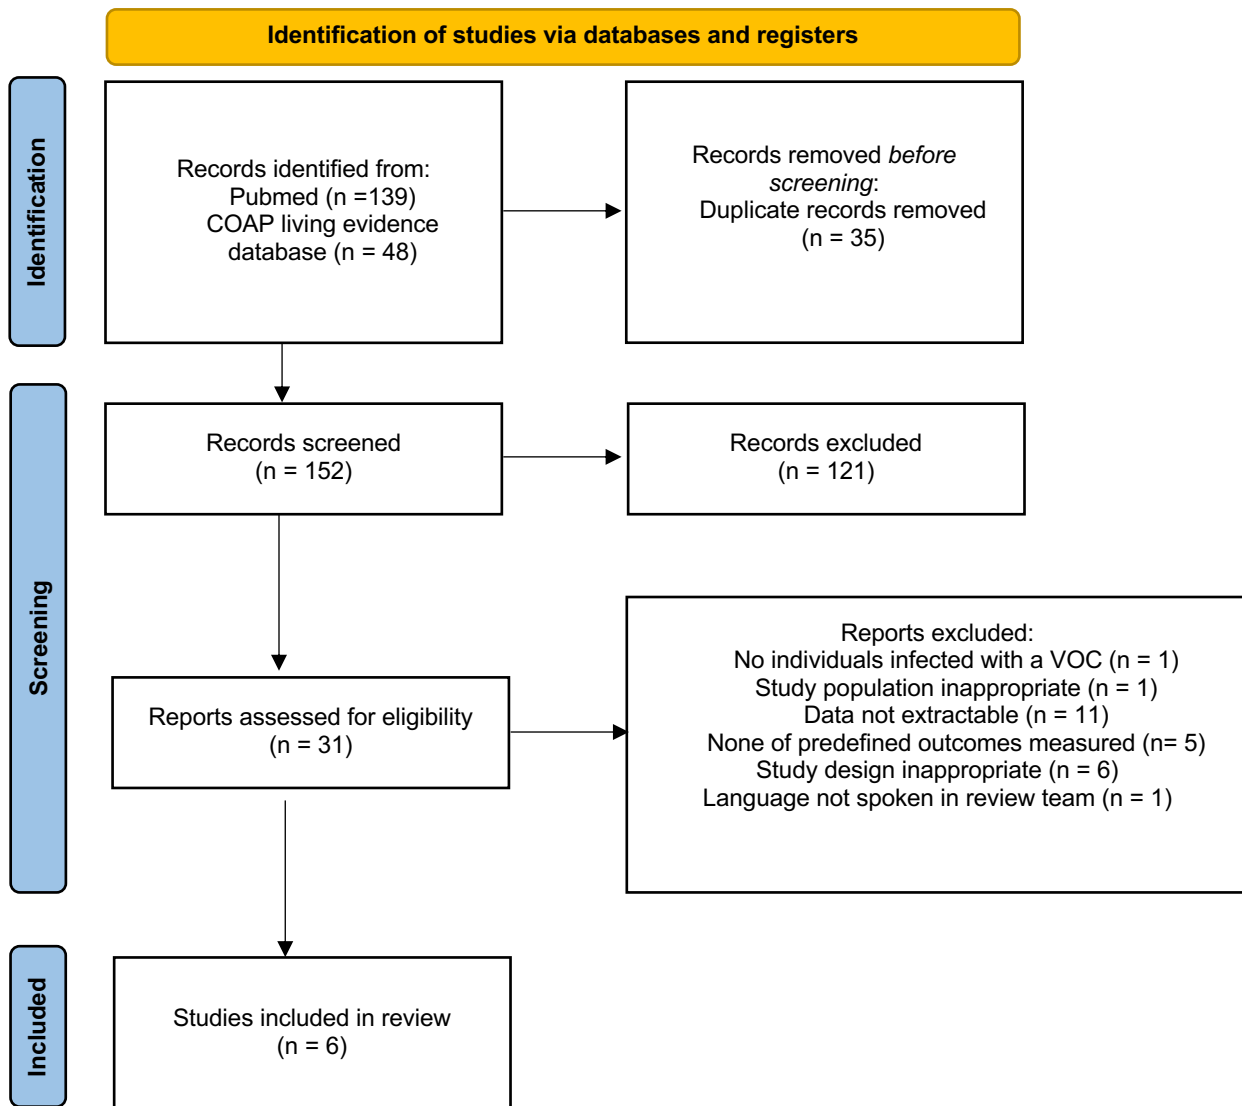

**Supplementary figure 3: Flow chart – third search (31.01.2022-07.03.2022)  
Of the 187 studies found via database searches 6 were found to be eligible for this systematic review.**

From: Page MJ, McKenzie JE, Bossuyt PM, Boutron I, Hoffmann TC, Mulrow CD, et al. The PRISMA 2020 statement: an updated guideline for reporting systematic reviews. *BMJ* 2021;372:n71. doi: 10.1136/bmj.n71
