# Supplementary material for: The role of SARS-CoV-2 variants of concern in children and adolescents with COVID-19: a systematic review
Source: bioRxiv or medRxiv preprint supplement (doi:10.1101/2023.01.12.23284434), 2023-01-12
Supplement: Supplementary file [file media-7.pdf]

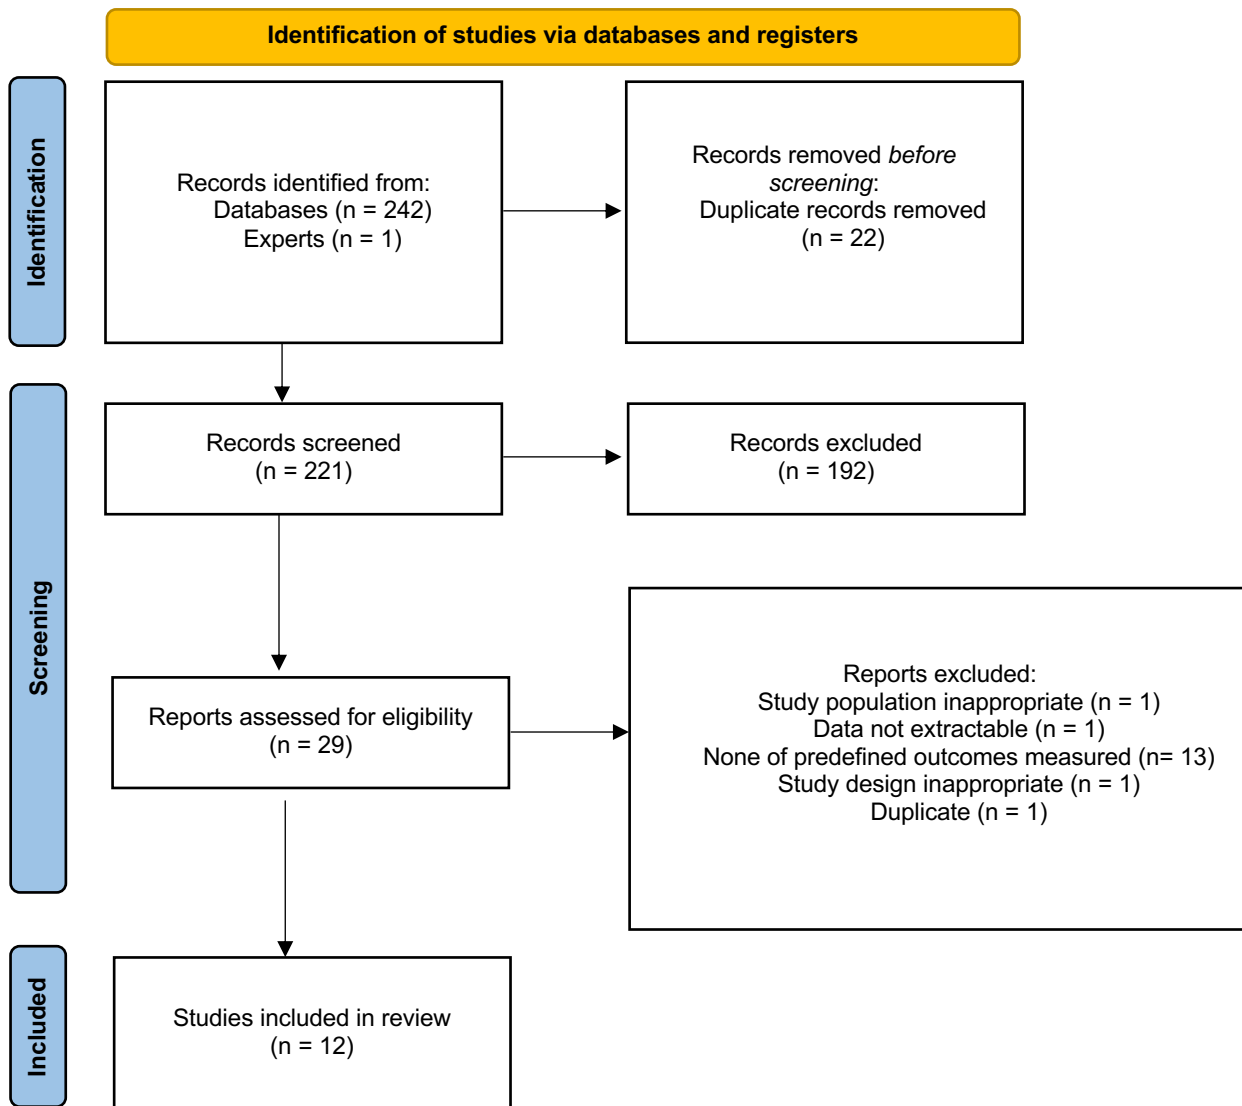

**Supplementary figure 4: Flow chart – fourth search (07.03.2022-09.05.2022)**

**Of the 243 studies found via the database search (incl. 1 study recommended by experts) 12 studies were found to be eligible.**

*From:* Page MJ, McKenzie JE, Bossuyt PM, Boutron I, Hoffmann TC, Mulrow CD, et al. The PRISMA 2020 statement: an updated guideline for reporting systematic reviews. *BMJ* 2021;372:n71. doi: 10.1136/bmj.n71

For more information, visit: <http://www.prisma-statement.org/>
