# Supplementary material for: The role of SARS-CoV-2 variants of concern in children and adolescents with COVID-19: a systematic review
Source: bioRxiv or medRxiv preprint supplement (doi:10.1101/2023.01.12.23284434), 2023-01-12
Supplement: Supplementary file [file media-8.pdf]

## URL to search strategy

- a) COAP database search terms: (child\* AND variant\*) in title or abstract
- b) PubMed search child\*[Title/Abstract] OR "neonat\*[Title/Abstract] OR "adolesc\*[Title/Abstract] OR "infan\*[Title/Abstract] OR "teen\*[Title/Abstract] OR "pediatr\*[Title/Abstract] OR "paediatr\*[Title/Abstract] OR ("educational status"[MeSH Terms] OR ("educational"[Title/Abstract] AND "status"[Title/Abstract]) OR "educational status"[Title/Abstract] OR "schooling"[Title/Abstract] OR "education"[MeSH Terms] OR "education"[Title/Abstract] OR "school s"[Title/Abstract] OR "schooled"[Title/Abstract] OR "schools"[MeSH Terms] OR "schools"[Title/Abstract] OR "school"[Title/Abstract]) OR ("nurseries, infant"[MeSH Terms] OR ("nurseries"[Title/Abstract] AND "infant"[Title/Abstract]) OR "infant nurseries"[Title/Abstract] OR "nurseries"[Title/Abstract] OR "nursery"[Title/Abstract]) OR ("infant, newborn"[MeSH Terms] OR ("infant"[Title/Abstract] AND "newborn"[Title/Abstract]) OR "newborn infant"[Title/Abstract] OR "newborn"[Title/Abstract] OR "newborns"[Title/Abstract] OR "newborn s"[Title/Abstract]) OR "toddler\*[Title/Abstract] OR ("minority groups"[MeSH Terms] OR ("minority"[Title/Abstract] AND "groups"[Title/Abstract]) OR "minority groups"[Title/Abstract] OR "minorities"[Title/Abstract] OR "minority"[Title/Abstract] OR "minority s"[Title/Abstract] OR "minors"[MeSH Terms] OR "minors"[Title/Abstract] OR "minor"[Title/Abstract])
- AND
- "COVID-19"[tiab] OR 2019-novel-cov\*[tiab] OR coronavirus[tiab] OR coronavirus-disease-19\*[tiab] OR corona-virus-disease-19\*[tiab] OR covid-19\*[tiab] OR covid19\*[tiab] OR new-coronavirus[tiab] OR new-corona-virus[tiab] OR novel-coronavirus[tiab] OR novel-corona-virus[tiab] OR sars-2\*[tiab] OR sars2\*[tiab] OR sars-cov-19\*[tiab] OR sarscov19\*[tiab] OR sars-cov-2\*[tiab] OR sars-cov2\*[tiab] OR sarscov2\*[tiab] OR sarscov-2\*[tiab]
- AND
- "VOC"[All Fields] OR "variant of concern"[All Fields] OR "alpha variant"[All Fields] OR "beta variant"[All Fields] OR "gamma variant"[All Fields] OR "delta variant"[All Fields] OR "omicron variant"[All Fields] OR "variant of interest"[All Fields]
